# Supplementary material
Source: PubMed Central journal article supplement (PMC5679003)
Supplement: NIHMS877183-supplement-Supplemental_data.pdf [file NIHMS877183-supplement-Supplemental_data.pdf]

Development of a Method for the Determination of Acyl-CoA Compounds by Liquid Chromatography Mass Spectrometry to Probe the Metabolism of Fatty Acids

Xiangkun Yang<sup>†‡</sup>, Yongjie Ma<sup>†‡</sup>, Ning Li<sup>§</sup>, Houjian Cai<sup>†</sup> and Michael G. Bartlett<sup>†\*</sup>

<sup>†</sup> Department of Pharmaceutical and Biomedical Sciences, University of Georgia, 250 W. Green Street, Athens, Georgia 30602, United States

<sup>§</sup> Department of Analytical Chemistry, School of Pharmacy, Shenyang Pharmaceutical University, 103 Wenhua Road, Shenyang, 110016, China

\* Email: Michael G. Bartlett [mgbart@uga.edu](mailto:mgbart@uga.edu)

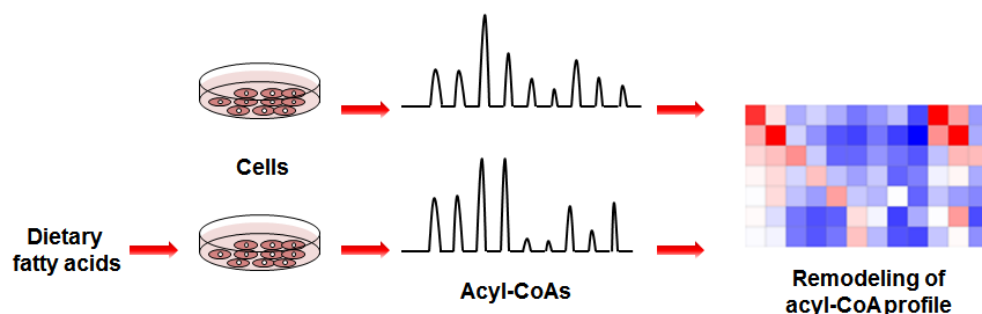

**ABSTRACT:** Acyl-Coenzyme As (acyl-CoAs) are a group of activated fatty acid molecules participating in multiple cellular processes including lipid synthesis, oxidative metabolism of fatty acids to produce ATP, transcriptional regulation and protein post-translational modification. Quantification of cellular acyl-CoAs is challenging due to their instability in aqueous solutions and lack of blank matrices. Here we demonstrate an LC-MS/MS analytical method which allows for absolute quantitation with broad coverage of cellular acyl-CoAs. This assay was applied to profile endogenous acyl-CoAs under the challenge of a variety of dietary fatty acids in prostate and hepatic cells. Additionally, this approach allowed for detection of multiple fatty acid metabolic processes including the biogenesis of acyl-CoAs, and their elongation, degradation, and desaturation. Hierarchical clustering in the remodeling of acyl-CoA profiles revealed a fatty acid-specific pattern across all tested cell lines, which provides a valuable reference for making predictions in other cell models. Individual acyl-CoAs were identified which were altered differentially by exogenous fatty acids in divergent tumorigenicity states of cells. These findings demonstrate the power of acyl-CoA profiling toward understanding the mechanisms for the progression of tumors or other diseases in response to fatty acids.

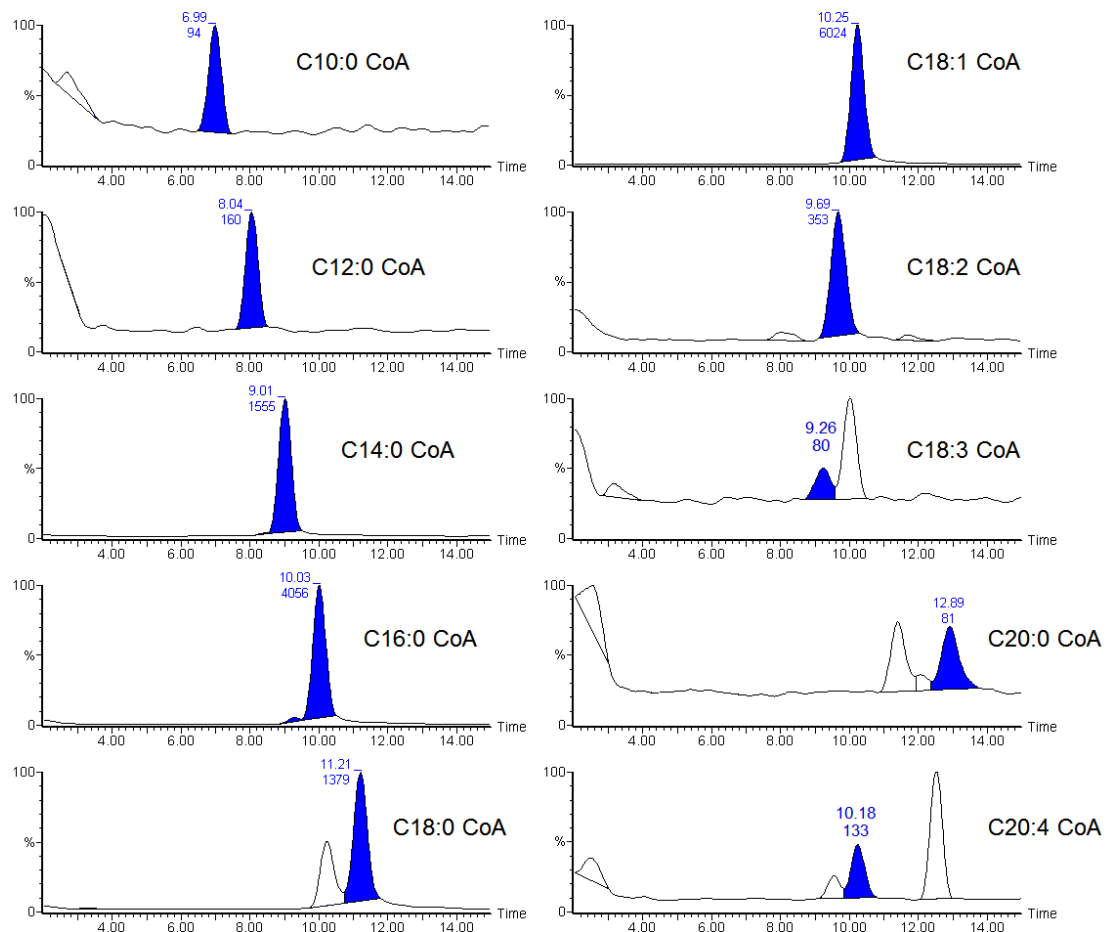

Figure S1. Representative chromatograms of acyl-CoA analytes in HepG2 cells. Retention times (min) and peak areas are labeled.

| Name  | Forward Sequence        | Reverse Sequence       |
|-------|-------------------------|------------------------|
| ACSL1 | TCTTCCCCGTGGTTCCAA      | TGGTGTTTGCTTGCCGAAA    |
| ACSL3 | ACTCCACTGTGCGACAGCTTT   | CACCACACAACAGGAGACGAA  |
| ACSL4 | ACTGGCCGACCTAAGGGAG     | GCCAAAGGCAAGTAGCCAATA  |
| ACSL5 | TGGCTATCTTACAAACAGGTGTC | TCCA CTCTGGCCTATTCTGAG |
| ACSL6 | CGCTACATCATCAATACAGCGG  | GCATGGACTTAATGACCACCC  |
| GAPDH | CCACATCGCTCAGACACCAT    | ACCAGGCGCCCAATACG      |

Table S1. Primer sets for real-time RT-PCR analysis of expression of ACSL genes.

| <b>PNT2</b> | Control | C10:0    | C12:0    | C14:0    | C16:0    | C18:0    | C18:1    | C18:1<br>EA | C20:0   |
|-------------|---------|----------|----------|----------|----------|----------|----------|-------------|---------|
| 10:0        | 2.40 ±  | 129.88 ± | 26.61 ±  | 15.44 ±  | 10.27 ±  | 9.00 ±   | 9.74 ±   | 8.66 ±      | 2.81 ±  |
| CoA         | 0.99    | 35.13    | 1.44     | 0.80     | 1.00     | 2.99     | 1.35     | 2.42        | 1.81    |
| 12:0        | 3.55 ±  | 19.66 ±  | 365.17 ± | 31.28 ±  | 21.75 ±  | 21.61 ±  | 8.76 ±   | 11.42 ±     | 5.34 ±  |
| CoA         | 1.22    | 4.95     | 44.89    | 6.62     | 7.12     | 1.80     | 1.42     | 1.16        | 1.66    |
| 14:0        | 22.49 ± | 29.67 ±  | 48.38 ±  | 363.56 ± | 50.23 ±  | 37.97 ±  | 14.47 ±  | 15.35 ±     | 16.02 ± |
| CoA         | 0.41    | 6.21     | 1.37     | 55.25    | 3.23     | 2.32     | 1.68     | 3.20        | 3.81    |
| 16:0        | 36.81 ± | 77.10 ±  | 34.70 ±  | 72.05    | 316.58   | 39.31 ±  | 14.75 ±  | 15.83 ±     | 23.71 ± |
| CoA         | 1.56    | 17.15    | 4.57     | ±13.08   | ±17.96   | 8.12     | 0.58     | 1.50        | 2.12    |
| 18:0        | 23.33 ± | 29.87 ±  | 9.65 ±   | 12.22 ±  | 39.95 ±  | 298.33   | 11.19 ±  | 15.14 ±     | 21.53 ± |
| CoA         | 3.15    | 7.66     | 1.73     | 1.89     | 2.97     | ±27.36   | 1.83     | 2.03        | 1.63    |
| 18:1        | 92.25 ± | 60.85 ±  | 30.55 ±  | 47.97 ±  | 103.78 ± | 172.85 ± | 545.17 ± | 762.97 ±    | 63.04 ± |
| CoA         | 6.74    | 16.74    | 2.97     | 11.38    | 8.36     | 9.33     | 46.29    | 24.58       | 11.62   |
| 18:2        | 4.38 ±  | 4.37 ±   | 2.84 ±   | 4.23 ±   | 8.14 ±   | 6.47 ±   | 14.34 ±  | 6.73 ±      | 5.45 ±  |
| CoA         | 4.48    | 0.71     | 0.67     | 1.25     | 1.38     | 1.69     | 1.61     | 1.17        | 2.55    |
| 20:0        | 2.28 ±  | 3.66 ±   | 0.72 ±   | 1.39 ±   | 1.17 ±   | 8.43 ±   | 0.74 ±   | 0.92 ±      | 38.94 ± |
| CoA         | 0.18    | 1.05     | 0.76     | 1.14     | 0.68     | 2.15     | 0.32     | 0.43        | 11.49   |
| 20:4        | 8.03 ±  | 2.92 ±   | 1.14 ±   | 3.41 ±   | 5.77 ±   | 4.16 ±   | 10.29 ±  | 2.84 ±      | 2.65 ±  |
| CoA         | 2.09    | 0.27     | 0.66     | 1.66     | 2.28     | 1.33     | 2.81     | 0.92        | 1.57    |

| <b>DU145</b> | Control        | C10:0    | C12:0    | C14:0    | C16:0    | C18:0    | C18:1   | C18:1<br>EA | C20:0   |
|--------------|----------------|----------|----------|----------|----------|----------|---------|-------------|---------|
| 10:0         |                | 184.82 ± | 11.74 ±  | 1.23 ±   | 2.32 ±   | 1.31 ±   | 4.67 ±  | 1.34 ±      | 0.52 ±  |
| CoA          | 0.73 ±<br>0.38 | 32.23    | 0.81     | 0.45     | 0.58     | 0.37     | 1.15    | 0.74        | 0.10    |
| 12:0         |                | 7.39 ±   | 233.04 ± | 5.59 ±   | 2.47 ±   | 0.62 ±   | 0.78 ±  | 2.36 ±      | 0.56 ±  |
| CoA          | 0.58 ±<br>0.15 | 0.72     | 5.58     | 1.76     | 0.53     | 0.59     | 0.70    | 1.68        | 0.26    |
| 14:0         | 28.78          | 30.37 ±  | 36.67 ±  | 260.33 ± | 36.66 ±  | 22.86 ±  | 15.34 ± | 25.75 ±     | 10.16 ± |
| CoA          | ±0.67          | 2.56     | 1.65     | 30.37    | 3.52     | 2.84     | 4.29    | 7.58        | 0.62    |
| 16:0         | 43.61          | 54.59 ±  | 37.48 ±  | 48.69 ±  | 555.89 ± | 20.00 ±  | 6.28 ±  | 18.90 ±     | 10.57 ± |
| CoA          | ±2.17          | 6.13     | 1.30     | 4.42     | 24.79    | 2.45     | 1.43    | 2.81        | 2.60    |
| 18:0         | 28.96          | 24.15 ±  | 7.62 ±   | 8.59 ±   | 42.07 ±  | 281.53 ± | 5.97 ±  | 28.18 ±     | 6.27 ±  |
| CoA          | ±5.28          | 3.67     | 1.73     | 0.98     | 2.33     | 13.10    | 0.71    | 8.73        | 0.36    |
| 18:1         | 75.54          | 37.48 ±  | 25.37 ±  | 25.85 ±  | 94.76 ±  | 53.20 ±  | 532.53  | 552.21 ±    | 11.19 ± |
| CoA          | ±8.97          | 6.31     | 0.17     | 2.44     | 6.47     | 1.25     | ±31.64  | 85.21       | 1.48    |
| 18:2         |                | 6.28 ±   | 3.41 ±   | 3.71 ±   | 8.89 ±   | 6.92 ±   | 7.37 ±  | 5.06 ±      | 5.49 ±  |
| CoA          | 7.49 ±<br>2.63 | 0.41     | 0.85     | 0.99     | 1.93     | 1.21     | 2.30    | 1.40        | 1.67    |
| 20:0         |                | 3.80 ±   | 0.95 ±   | 1.08 ±   | 2.14 ±   | 11.17 ±  | 0.75 ±  | 2.29 ±      | 23.24 ± |
| CoA          | 2.34 ±         | 1.49     | 0.23     | 0.56     | 0.85     | 2.80     | 0.47    | 0.91        | 1.47    |

|             |                |                |                |                |                |                |                |                |                |
|-------------|----------------|----------------|----------------|----------------|----------------|----------------|----------------|----------------|----------------|
|             | 0.36           |                |                |                |                |                |                |                |                |
| 20:4<br>CoA | 3.70 ±<br>0.97 | 4.04 ±<br>0.38 | 1.94 ±<br>0.53 | 2.17 ±<br>0.45 | 3.23 ±<br>0.97 | 3.12 ±<br>0.74 | 8.39 ±<br>0.51 | 1.92 ±<br>0.22 | 3.78 ±<br>0.99 |

| <b>HepG<br/>2</b> | Control           | C10:0             | C12:0            | C14:0             | C16:0             | C18:0             | C18:1             | C18:1<br>EA       | C20:0             |
|-------------------|-------------------|-------------------|------------------|-------------------|-------------------|-------------------|-------------------|-------------------|-------------------|
| 10:0<br>CoA       | 5.16 ±<br>1.07    | 132.57 ±<br>18.76 | 23.51 ±<br>1.69  | 7.92 ±<br>0.17    | 5.84 ±<br>0.49    | 5.61 ±<br>2.86    | 6.65 ±<br>1.34    | 5.97 ±<br>1.00    | 6.13 ±<br>1.67    |
| 12:0<br>CoA       | 6.90 ±<br>0.35    | 12.87 ±<br>2.36   | 155.32 ±<br>9.00 | 20.51 ±<br>3.52   | 9.32 ±<br>1.23    | 10.16 ±<br>3.19   | 8.70 ±<br>1.63    | 9.95 ±<br>0.28    | 10.04 ±<br>1.75   |
| 14:0<br>CoA       | 90.62 ±<br>11.26  | 54.91 ±<br>9.23   | 67.8 ±<br>2.29   | 232.91 ±<br>58.40 | 82.33 ±<br>5.63   | 104.6 ±<br>21.37  | 101.23 ±<br>7.87  | 110.71 ±<br>18.00 | 104.31 ±<br>10.77 |
| 16:0<br>CoA       | 143.89 ±<br>17.40 | 81.25 ±<br>8.43   | 92.46 ±<br>4.42  | 132.75 ±<br>5.73  | 237.55 ±<br>10.31 | 219.25 ±<br>42.27 | 147.12 ±<br>7.24  | 183.35 ±<br>19.71 | 179.17 ±<br>22.09 |
| 18:0<br>CoA       | 58.59 ±<br>9.10   | 36.84 ±<br>2.70   | 31.98 ±<br>2.64  | 36.81 ±<br>2.81   | 64.05 ±<br>7.14   | 208.47 ±<br>37.44 | 47.93 ±<br>4.61   | 67.40 ±<br>14.92  | 66.7 ±<br>12.69   |
| 18:1<br>CoA       | 262.57 ±<br>31.98 | 123.24 ±<br>7.97  | 151.9 ±<br>12.23 | 206.88 ±<br>17.71 | 275.4 ±<br>16.33  | 445.83 ±<br>86.15 | 526.67 ±<br>22.31 | 664.62 ±<br>99.36 | 332.83 ±<br>47.03 |
| 18:2<br>CoA       | 17.47 ±<br>2.84   | 6.82 ±<br>0.99    | 8.83 ±<br>0.92   | 15.24 ±<br>3.17   | 17.49 ±<br>1.74   | 21.99 ±<br>5.13   | 20.93 ±<br>3.40   | 27.84 ±<br>2.32   | 18.67 ±<br>3.34   |
| 18:3<br>CoA       | 1.35 ±<br>0.26    | 0.53 ±<br>0.30    | 0.83 ±<br>0.52   | 0.54 ±<br>0.47    | 0.69 ±<br>0.66    | 1.63 ±<br>1.01    | 0.86 ±<br>0.78    | 1.34 ±<br>0.74    | 1.46 ±<br>0.41    |
| 20:0<br>CoA       | 2.51 ±<br>0.20    | 2.29 ±<br>0.42    | 1.12 ±<br>0.07   | 1.85 ±<br>0.06    | 1.46 ±<br>0.39    | 4.56 ±<br>1.01    | 1.43 ±<br>1.26    | 1.56 ±<br>0.61    | 21.83 ±<br>2.24   |
| 20:4<br>CoA       | 5.32 ±<br>0.59    | 2.46 ±<br>0.45    | 2.45 ±<br>0.39   | 2.85 ±<br>1.78    | 3.43 ±<br>1.39    | 6.40 ±<br>2.87    | 9.75 ±<br>2.16    | 4.84 ±<br>4.10    | 6.78 ±<br>0.70    |

| <b>Hep3B</b> | Control          | C10:0           | C12:0           | C14:0             | C16:0           | C18:0           | C18:1             | C18:1<br>EA       | C20:0           |
|--------------|------------------|-----------------|-----------------|-------------------|-----------------|-----------------|-------------------|-------------------|-----------------|
| 10:0<br>CoA  | 3.61 ±<br>0.38   | 49.26 ±<br>6.96 | 13.12 ±<br>2.56 | 5.51 ±<br>0.66    | 5.14 ±<br>1.03  | 4.83 ±<br>0.30  | 4.73 ±<br>0.18    | 8.39 ±<br>2.36    | 4.74 ±<br>0.67  |
| 12:0<br>CoA  | 1.20 ±<br>0.57   | 7.51 ±<br>0.85  | 48.95 ±<br>1.88 | 8.19 ±<br>1.07    | 2.61 ±<br>0.60  | 2.44 ±<br>0.63  | 2.10 ±<br>0.22    | 3.14 ±<br>0.48    | 1.92 ±<br>0.82  |
| 14:0<br>CoA  | 31.51 ±<br>2.26  | 56.12 ±<br>2.81 | 78.95 ±<br>4.26 | 238.85 ±<br>12.68 | 41.08 ±<br>4.25 | 49.08 ±<br>2.10 | 51.32 ±<br>6.90   | 73.51 ±<br>6.54   | 50.61 ±<br>6.49 |
| 16:0<br>CoA  | 42.79 ±<br>9.33  | 61.11 ±<br>3.01 | 48.52 ±<br>1.03 | 84.26 ±<br>4.18   | 92.00 ±<br>9.78 | 49.87 ±<br>7.90 | 56.82 ±<br>10.20  | 57.57 ±<br>7.06   | 76.09 ±<br>5.33 |
| 18:0<br>CoA  | 7.73 ±<br>1.31   | 9.32 ±<br>3.34  | 4.51 ±<br>0.53  | 8.93 ±<br>0.45    | 11.43 ±<br>1.37 | 33.53 ±<br>2.86 | 12.25 ±<br>3.41   | 14.11 ±<br>0.72   | 12.25 ±<br>1.71 |
| 18:1<br>CoA  | 35.01 ±<br>11.58 | 40.64 ±<br>1.80 | 24.98 ±<br>1.93 | 43.22 ±<br>4.61   | 41.44 ±<br>4.39 | 50.35 ±<br>3.45 | 153.16 ±<br>22.16 | 187.26 ±<br>25.99 | 67.40 ±<br>8.07 |
| 18:2<br>CoA  | 28.29 ±<br>6.72  | 36.71 ±<br>0.83 | 27.51 ±<br>2.72 | 40.80 ±<br>6.42   | 34.27 ±<br>3.23 | 41.27 ±<br>3.96 | 46.86 ±<br>5.39   | 58.37 ±<br>10.08  | 45.90 ±<br>8.59 |

|      |        |         |         |         |         |         |         |         |         |
|------|--------|---------|---------|---------|---------|---------|---------|---------|---------|
| 18:3 | 2.52 ± | 3.58 ±  | 4.13 ±  | 6.19 ±  | 3.80 ±  | 3.06 ±  | 2.14 ±  | 2.12 ±  | 3.31 ±  |
| CoA  | 1.03   | 1.05    | 0.20    | 0.45    | 0.58    | 0.86    | 0.61    | 0.25    | 0.50    |
| 20:0 | 0.53 ± | 0.14 ±  | 0.50 ±  | 0.47 ±  | 0.39 ±  | 0.94 ±  | 1.20 ±  | 0.97 ±  | 1.75 ±  |
| CoA  | 0.08   | 0.02    | 0.33    | 0.22    | 0.07    | 0.45    | 0.11    | 0.23    | 0.55    |
| 20:4 | 7.63 ± | 10.26 ± | 10.34 ± | 17.44 ± | 13.96 ± | 15.75 ± | 21.21 ± | 16.44 ± | 15.17 ± |
| CoA  | 2.53   | 0.29    | 1.12    | 2.02    | 1.67    | 3.34    | 2.54    | 2.45    | 3.75    |

Table S2. Amounts of acyl-CoAs (pmol/mg protein) in PNT2, DU145, HepG2 and Hep3B cells (n = 3) incubated with 400  $\mu$ M fatty acids for 24 h.
